# Supplementary material
Source: PubMed Central journal article supplement (PMC7689883)
Supplement: ao0c04694_si_001.pdf [file ao0c04694_si_001.pdf]

# **Ab-Initio Molecular Dynamics Investigation of CH<sub>4</sub>/CO<sub>2</sub> Adsorption on Calcite: Improving the Enhanced Gas Recovery Process**

Giuliano Carchini,<sup>1</sup> Mohammed J. Al-Marri,<sup>2\*</sup> Ibnelwaleed A. Hussein,<sup>1\*</sup> Santiago Aparicio<sup>3</sup>

<sup>1</sup>Gas Processing Center, College of Engineering, Qatar University, P.O. Box 2713, Doha, Qatar

<sup>2</sup>Department of Chemical Engineering, College of Engineering, Qatar University, P.O. Box 2713 Doha, Qatar

<sup>3</sup>Department of Chemistry, University of Burgos, 09001 Burgos, Spain

\*Corresponding Authors: Prof. I.A. Hussein, [ihussein@qu.edu.qa](mailto:ihussein@qu.edu.qa); Dr. M.J Al-Marri, [m.almarri@qu.edu.qa](mailto:m.almarri@qu.edu.qa)

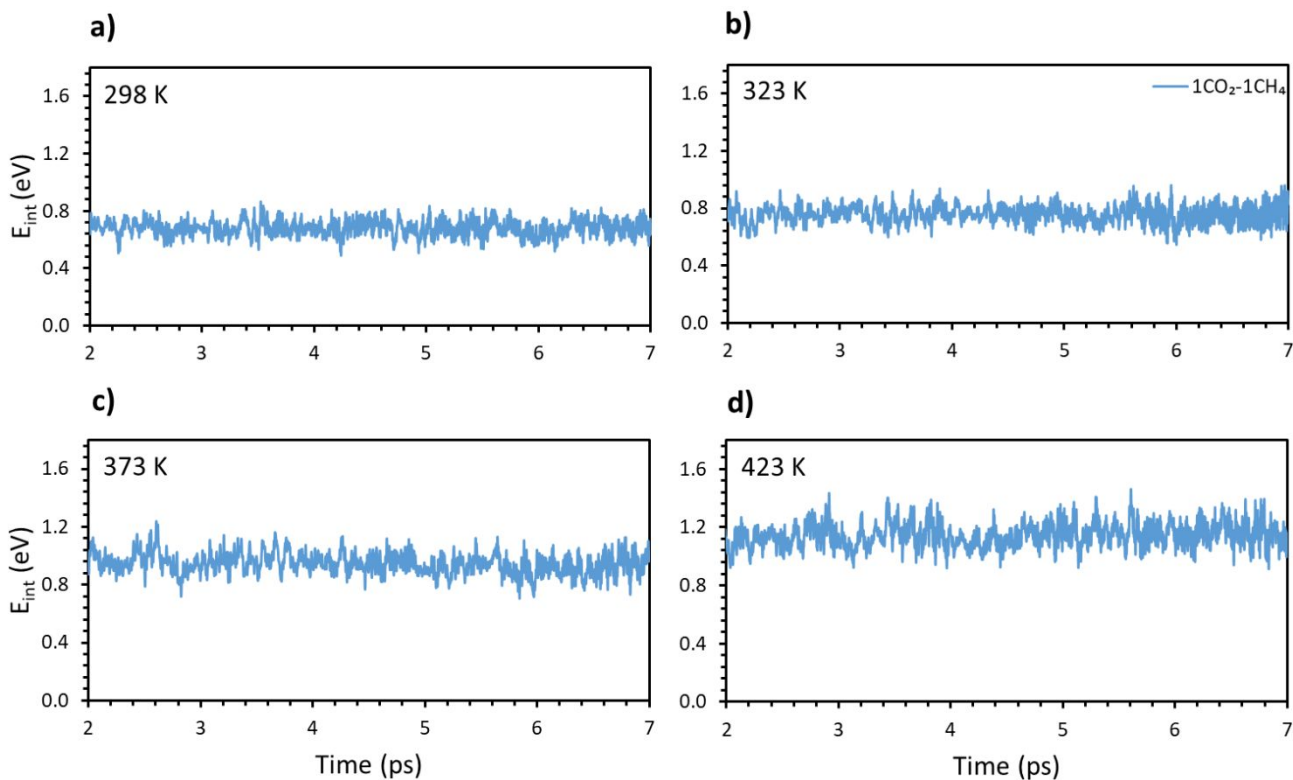

**Figure S1:** Interaction Energy for the mixed composition 1CO<sub>2</sub>:1CH<sub>4</sub> at different temperatures: a) 298 K, b) 323 K, c) 373 and d) 423 K.

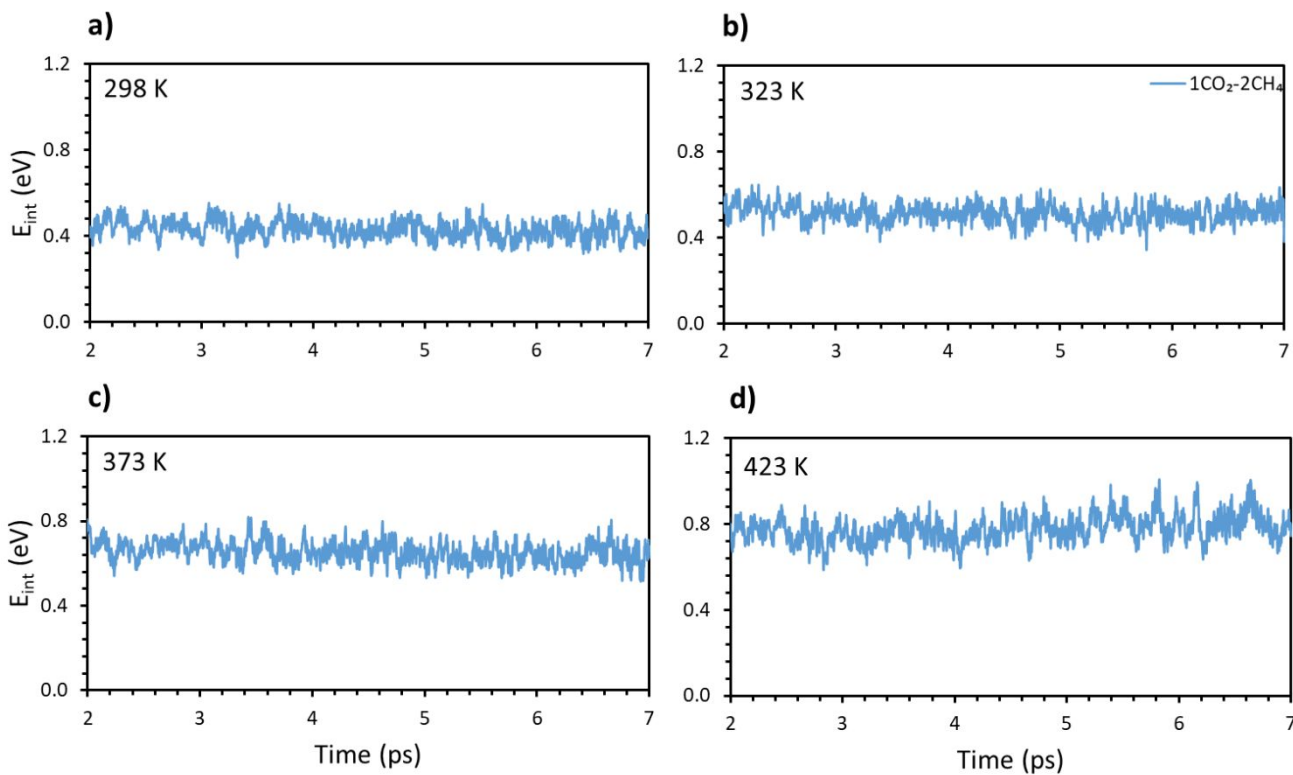

**Figure S2:** Interaction Energy for the mixed composition 1CO<sub>2</sub>:2CH<sub>4</sub> at different temperatures: a) 298 K, b) 323 K, c) 373 and d) 423 K.

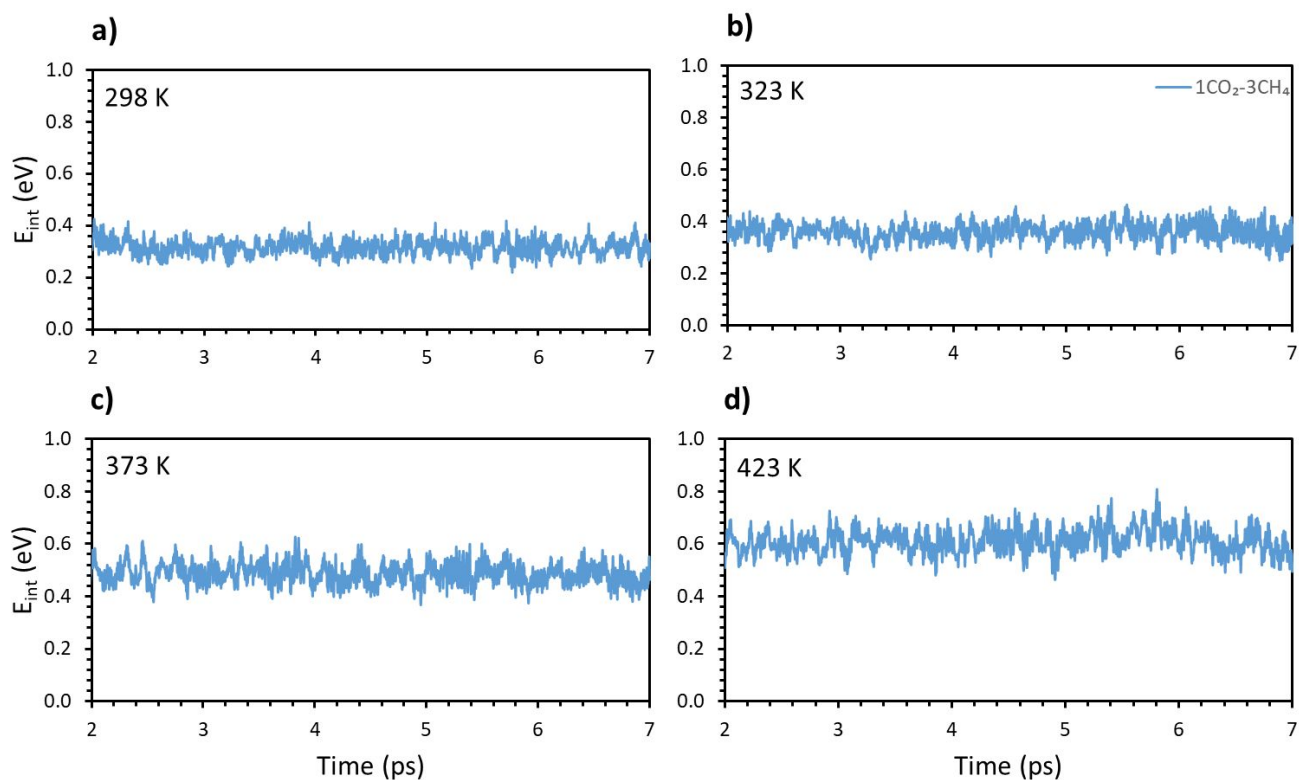

**Figure S3:** Interaction Energy for the mixed composition  $1\text{CO}_2:3\text{CH}_4$  at different temperatures: a) 298 K, b) 323 K, c) 373 and d) 423 K.

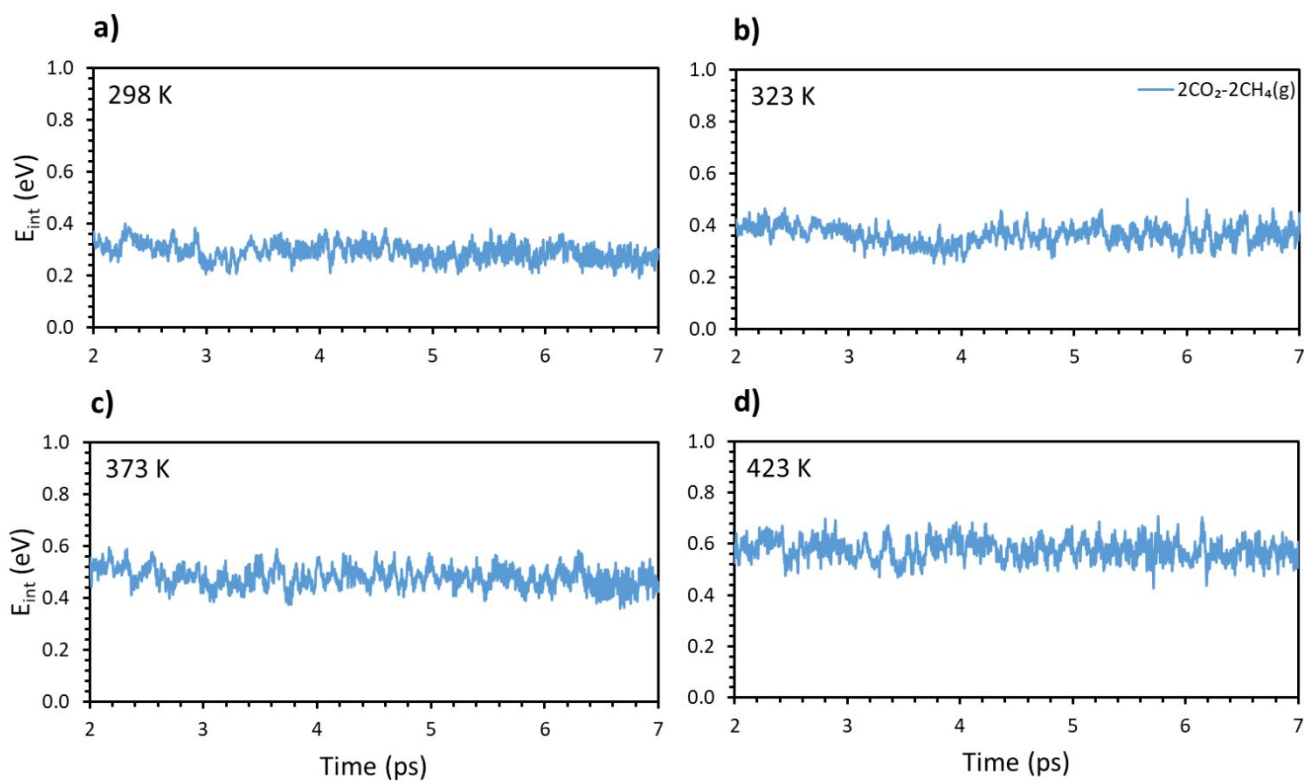

**Figure S4:** Interaction Energy for the gas phase  $2\text{CO}_2:2\text{CH}_4$  at different temperatures: a) 298 K, b) 323 K, c) 373 and d) 423 K.
